# Supplementary material
Source: PubMed Central journal article supplement (PMC6141187)

**Supplementary materials for J.T. Bridgham, E.A. Ortlund, J.W. Thornton, “An epistatic ratchet constrains the direction of glucocorticoid receptor evolution.”**

CONTENTS

- Table S1. Data collection and refinement statistics for crystal structure of AncGR2-dexamethasone complex
- Fig. S1. Amino acid changes that occurred in the interval between AncGR1 and AncGR2
- Fig. S2. Crystal structure of AncGR2-dexamethasone complex
- Fig. S3. 2Fo-Fc omit electron density for dexamethasone in the AncGR2 ligand binding pocket
- Fig. S4. Effect of individual w mutations on AncGR2 reversibility
- Fig. S5. Dose Response curves for all combinations of substitutions X, Y, Z, and W

Table S1. Data collection and refinement statistics for the AncGR2-dexamethasone crystal structure.

|                                                                     | <b>AncGR2 – DEX</b>                                              |
|---------------------------------------------------------------------|------------------------------------------------------------------|
| Resolution (highest shell)                                          | 2.5 Å (2.50– 2.59 Å)                                             |
| Space Group                                                         | P6 <sub>1</sub>                                                  |
| Unit Cell Dimensions                                                | a=104.2, b=104.2, c=144.2<br>$\alpha=\beta= 90.0, \gamma= 120.0$ |
| No. of Reflections                                                  | 30813                                                            |
| R <sup>a</sup> <sub>sym</sub> (highest shell)                       | 11.5% (44.2%)                                                    |
| Completeness (highest shell)                                        | 100.0% (100.0%)                                                  |
| Ave. Redundancy (highest shell)                                     | 7.3 (7.3)                                                        |
| I/ $\sigma$                                                         | 23.4 (5.2)                                                       |
| Monomers per asymmetric unit (AU)                                   | 2                                                                |
| No. of protein atoms/AU                                             | 4427                                                             |
| No. of ligand atoms/AU                                              | 56                                                               |
| No. of waters/AU                                                    | 157                                                              |
| R <sup>b</sup> <sub>working</sub> (R <sup>c</sup> <sub>free</sub> ) | 19.9% (25.8%)                                                    |
| <i>Ave. B-factors, Å<sup>2</sup></i>                                |                                                                  |
| Protein                                                             | 39.5                                                             |
| Ligand                                                              | 23.9                                                             |
| Water                                                               | 41.7                                                             |
| r.m.s. deviations                                                   |                                                                  |
| Bond lengths, Å                                                     | 0.012                                                            |
| Bond angles, °                                                      | 1.385                                                            |

<sup>a</sup>  $R_{\text{sym}} = \sum |I - \langle I \rangle| / \sum I$ , where I is the observed intensity and  $\langle I \rangle$  is the average intensity of several symmetry-related observations.

<sup>b</sup>  $R_{\text{working}} = \sum ||F_o| - |F_c|| / \sum |F_o|$ , where F<sub>o</sub> and F<sub>c</sub> are the observed and calculated structure factors, respectively.

<sup>c</sup>  $R_{\text{free}} = \sum ||F_o| - |F_c|| / \sum |F_o|$  for 7% of the data not used at any stage of the structural refinement.

Fig. S1. Amino acid changes that occurred in the interval between AncGR1 and AncGR2. A) The aligned maximum likelihood sequences of AncGR1 and AncGR2 ligand-binding domains are shown, with selected extant human corticosteroid receptors (GR, glucocorticoid receptor; MR, mineralocorticoid receptor). Replacements in group W are in cyan, groups X, Y, and Z are in green. Other sites differing between AncGR1 and AncGR2 are in purple, and unchanged sites are in black. Secondary structural elements are labeled: H, helix;  $\beta$ ,  $\beta$ -strand, AF-H, activation function helix. B) Sites that changed between AncGR1 and AncGR2 are shown, with additional sequences to show patterns of conservation. Dots signify states identical to first sequence in each of the two sections of the alignment. Upper section shows AncGR2 and extant sequences that descend from it (teleost and tetrapod GRs). Bottom alignment shows sequences that do not descend from AncGR2 and lack GR's cortisol-specificity (AncGR1, MRs, agnathan CRs, and elasmobranch GR). Green, sites in groups X, Y, and Z. Blue, sites in group W. Of sites not in groups X, Y, and Z, only the group W sites are conserved in the AncGR1-like state in all or all but one of the AncGR1-like receptors. Sites are numbered by amino acid position in AncGR1-LBD and separated into groups of ten for clarity.

A)

|         |                                                                                                                                                                                                                                                             |
|---------|-------------------------------------------------------------------------------------------------------------------------------------------------------------------------------------------------------------------------------------------------------------|
| AncGR1  | SLISILEVIEPEVLYAGYDSSLPDT <sup>Z</sup> TNRL <sup>Y</sup> SSLNRLGGRQMVSVVKWAKALPGFRNLHLD                                                                                                                                                                     |
| AncGR2  | TLISLLEVIEPEVLYSGYDSTLPDTS <sup>Z</sup> TRLM <sup>Y</sup> STLNRLGGRQVVS <sup>Z</sup> AVKWAKALPGFRNLHLD                                                                                                                                                      |
| HumanGR | TLVSLLEVIEPEVLYAGYDSSVPDSTWRIM <sup>Z</sup> TLNMLGGRQVIA <sup>Z</sup> AVKWAKAIPGFRNLHLD                                                                                                                                                                     |
| HumanMR | SPVMVLENIEPEIVYAGYDSSKPD <sup>Z</sup> TAEN <sup>Y</sup> LSTLNRLAGKQMIQ <sup>Z</sup> VVKWAKVLPGFKNLPLE                                                                                                                                                       |
|         | H1 <span style="margin-left: 200px;">H3</span>                                                                                                                                                                                                              |
| AncGR1  | DQMTLLQYSWMSLMAFSLGWRSY <sup>W</sup> KHSNGNML <sup>W</sup> YFAPDL <sup>Y</sup> INEERMQ <sup>Z</sup> QSAMYD <sup>X</sup> LCQGM <sup>W</sup> MRKIS                                                                                                            |
| AncGR2  | DQMTLLQYSW <sup>W</sup> MFLMAFSLGWRSY <sup>W</sup> KQSNNGNML <sup>W</sup> CFAPDL <sup>Y</sup> INEERMQ <sup>Z</sup> LPYMYD <sup>X</sup> QCQ <sup>W</sup> MLKIS                                                                                               |
| HumanGR | DQMTLLQYSW <sup>W</sup> MFLMAFALGWRSY <sup>W</sup> RQSSANLL <sup>W</sup> CFAPDL <sup>Y</sup> INEQRMT <sup>Z</sup> LP <sup>X</sup> CMYD <sup>W</sup> QCKHMLYVS                                                                                               |
| HumanMR | DQITLLIQYSW <sup>W</sup> MCLSSFALSWRSY <sup>W</sup> KHTNSQ <sup>W</sup> FLYFAPDL <sup>Y</sup> VFNEEKMH <sup>Z</sup> QSAMYELCQGMHQIS                                                                                                                         |
|         | H4 <span style="margin-left: 50px;">H5</span> <span style="margin-left: 50px;"><math>\beta</math>3</span> <span style="margin-left: 20px;"><math>\beta</math>4</span> <span style="margin-left: 50px;">H6</span> <span style="margin-left: 50px;">H7</span> |
| AncGR1  | VEFVRLQV <sup>Z</sup> TYEEYL <sup>Z</sup> CMKVLLLLSTV <sup>Z</sup> PKDGLK <sup>Z</sup> SOAT <sup>Z</sup> FDEIRMSYIKELGKAI <sup>Z</sup> VKKEGNSSQ                                                                                                            |
| AncGR2  | SEFVRLQV <sup>Z</sup> SYDEYL <sup>Z</sup> CMKVLLLLSTV <sup>Z</sup> PKDGLK <sup>Z</sup> QAV <sup>Z</sup> FDEIRM <sup>Z</sup> TYIKELGKAI <sup>Z</sup> VKREGNSSQ                                                                                               |
| HumanGR | SELHRLQV <sup>Z</sup> SYEEYL <sup>Z</sup> CMKTL <sup>Z</sup> LLLLSSV <sup>Z</sup> PKDGLK <sup>Z</sup> QEL <sup>Z</sup> FDEIRM <sup>Z</sup> TYIKELGKAI <sup>Z</sup> VKREGNSSQ                                                                                |
| HumanMR | LQFVRLQ <sup>Z</sup> LT <sup>Z</sup> FE <sup>Z</sup> EYTIMKVLLLLSTI <sup>Z</sup> PKDGLK <sup>Z</sup> QA <sup>Z</sup> A <sup>Z</sup> FEEMRT <sup>Z</sup> NYIKELRKMVTK <sup>Z</sup> CPNNSSQ                                                                   |
|         | H7 <span style="margin-left: 100px;">H8</span> <span style="margin-left: 150px;">H9</span>                                                                                                                                                                  |
| AncGR1  | NWQRFYQLTKLLDSM <sup>W</sup> HDLV <sup>W</sup> GGLLQFCFYTFV <sup>Y</sup> QSK <sup>Y</sup> TLSVEFP <sup>Y</sup> EMLVEIISNQLPKVMAGMA                                                                                                                          |
| AncGR2  | NWQRFYQLTKLLDSM <sup>W</sup> HEMV <sup>W</sup> GGLLQFCFYTFV <sup>Y</sup> N-K <sup>Y</sup> SLSVEFP <sup>Y</sup> EMLAEIISNQLPKFKAGSV                                                                                                                          |
| HumanGR | NWQRFYQLTKLLDSM <sup>W</sup> HEV <sup>W</sup> VENLLNYCFQTF <sup>Y</sup> LD-K <sup>Y</sup> TMSIEFP <sup>Y</sup> EMLAEIITNQIPKYSNGNI                                                                                                                          |
| HumanMR | SWQRFYQLTKLLDSM <sup>W</sup> HDLV <sup>W</sup> SDLLEFCFYTF <sup>Y</sup> RESH <sup>Y</sup> ALKVEFP <sup>Y</sup> AMLVEIISDQLPKVESGNA                                                                                                                          |
|         | H10 <span style="margin-left: 200px;">AF-H</span>                                                                                                                                                                                                           |
| AncGR1  | KPLLFHQK                                                                                                                                                                                                                                                    |
| AncGR2  | KPLLFHQK                                                                                                                                                                                                                                                    |
| HumanGR | KKLLFHQK                                                                                                                                                                                                                                                    |
| HumanMR | KPLYFHRK                                                                                                                                                                                                                                                    |

B)

|                  |             |            |            |         |
|------------------|-------------|------------|------------|---------|
|                  |             | 11111      | 1111111112 | 2222222 |
|                  | 12222344    | 7899900011 | 1223567991 | 1123333 |
|                  | -1450569104 | 1417856714 | 6080413671 | 2444589 |
| AncGR2           | TLSTSTMTVA  | FQCVILPYQQ | LSSDVTREM  | -SAFKSV |
| HumanGR          | .VASTW....  | ...I...C.H | ...EL...VD | -T.YSNI |
| RatGR            | .VASAW....  | ...I...C.H | ...EL...VD | -T.YSNI |
| AstatotilapiaGR1 | ..A.F.....  | .....      | .....S...N | -.....  |
| TroutGR2         | .....       | .....      | .....S...N | -.....  |
| ParalichthysGR   | .....       | .....F..   | .N.....N   | -T..... |
| DicentrachusGR   | .....S....  | .....F..   | .N.....N   | -T..... |
| AstatotilapiaGR2 | .....S....  | .....F..   | .N.E....N  | -T...N. |
| TroutGR          | .....       | .....      | .T.....N   | -.....  |
|                  |             |            |            |         |
| AncGR1           | SIASTNLSMV  | SHYIFQSALG | RVTETSKDLQ | STVVMMA |
| HagfishSR1       | PV...T..LL  | GN.....    | .ESDSTQN.. | .LS.LH. |
| LampreySR1       | T.ST.A..LI  | G..V.....E | .E..C.T.I. | .VAHHE. |
| HumanMR          | .V..AE.T..  | C..V.....  | HL..ANC..E | .A..EN. |
| ChickenMR        | .V..AE.T..  | C.....     | HLS.ANC..E | .A..EN. |
| RatMR            | .A..AE.T..  | C..V.....  | .L..ANC..E | .A..EN. |
| XenopusMR        | .A.TAE....  | C.....     | QL..ANS..E | .A..EI. |
| TroutMRa         | .C.T.D....  | C..V.....  | .Q.QANA..E | .A..ENT |
| TroutMRb         | .C.T.D....  | C..V.....  | .Q.QANA..E | .A..ENT |
| AstatotilapiaMR  | .CS..D...M  | C.....     | .Q.DANA..E | .A..ELT |
| SkateMR          | .....I      | C..V.R.... | QI..SNNE.E | .A..T.T |
| SkateGR          | ....P..G..  | ..F...T..  | G.A.....   | .....   |

Fig. S2. Crystal structure of AncGR2-dexamethasone complex. Helices (numbered) are shown in bronze; AF-H, activation function helix. Dexamethasone is shown in purple, with coactivator peptide hTIF2 in yellow.

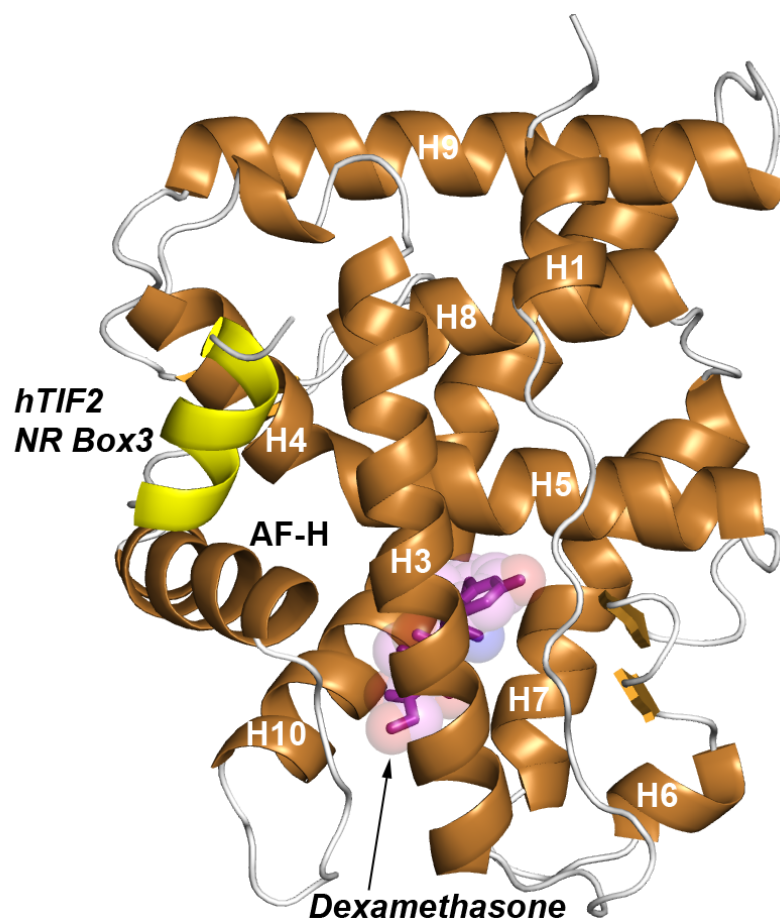

Fig. S3. 2Fo-Fc omit electron density for dexamethasone in the AncGR2 ligand binding pocket

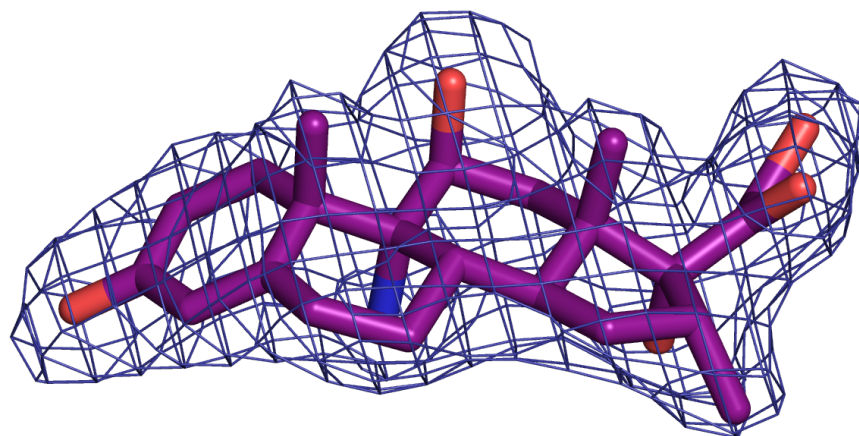

Fig. S4. Effect of reversing single and combined group w mutations on AncGR2 reversibility. Fold-activation of a luciferase reporter by variants of the AncGR2 ligand binding domain relative to vehicle-only control are shown with increasing concentrations of aldosterone (solid blue), DOC (dotted blue), and cortisol (purple).

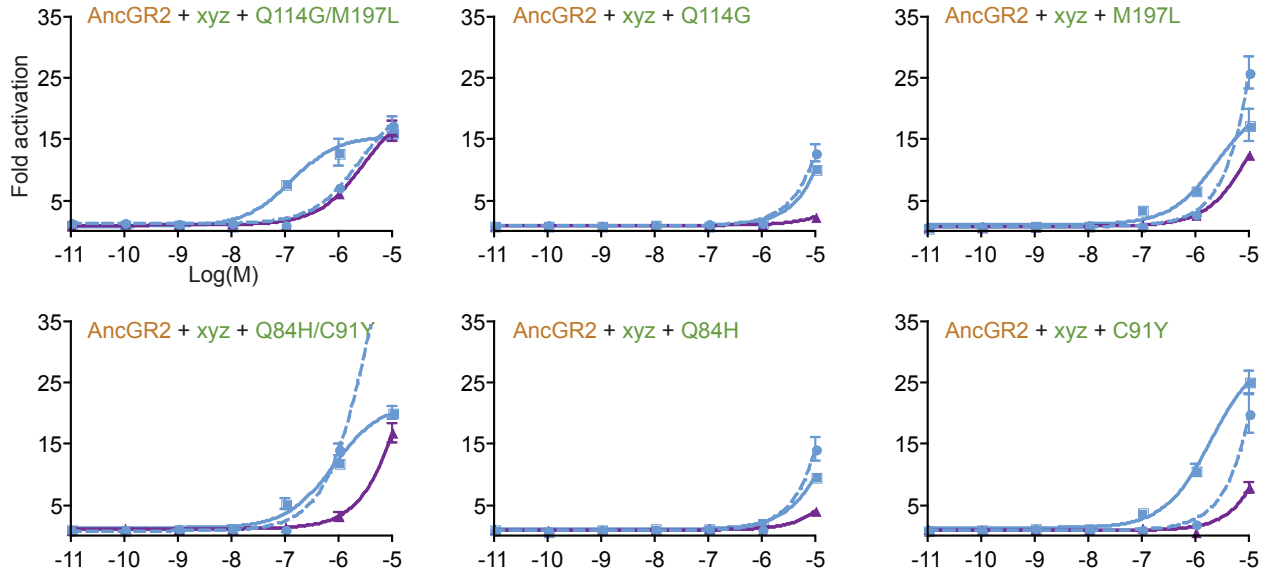

Fig. S5. Dose response curves for all combinations of substitution sets X, Y, Z, and W in AncGR2 background (left) and AncGR1 (right). Derived states at X,Y,Z and W positions are upper-case, and ancestral states are lower case. Solid blue, aldosterone; dashed blue, DOC; purple, cortisol.

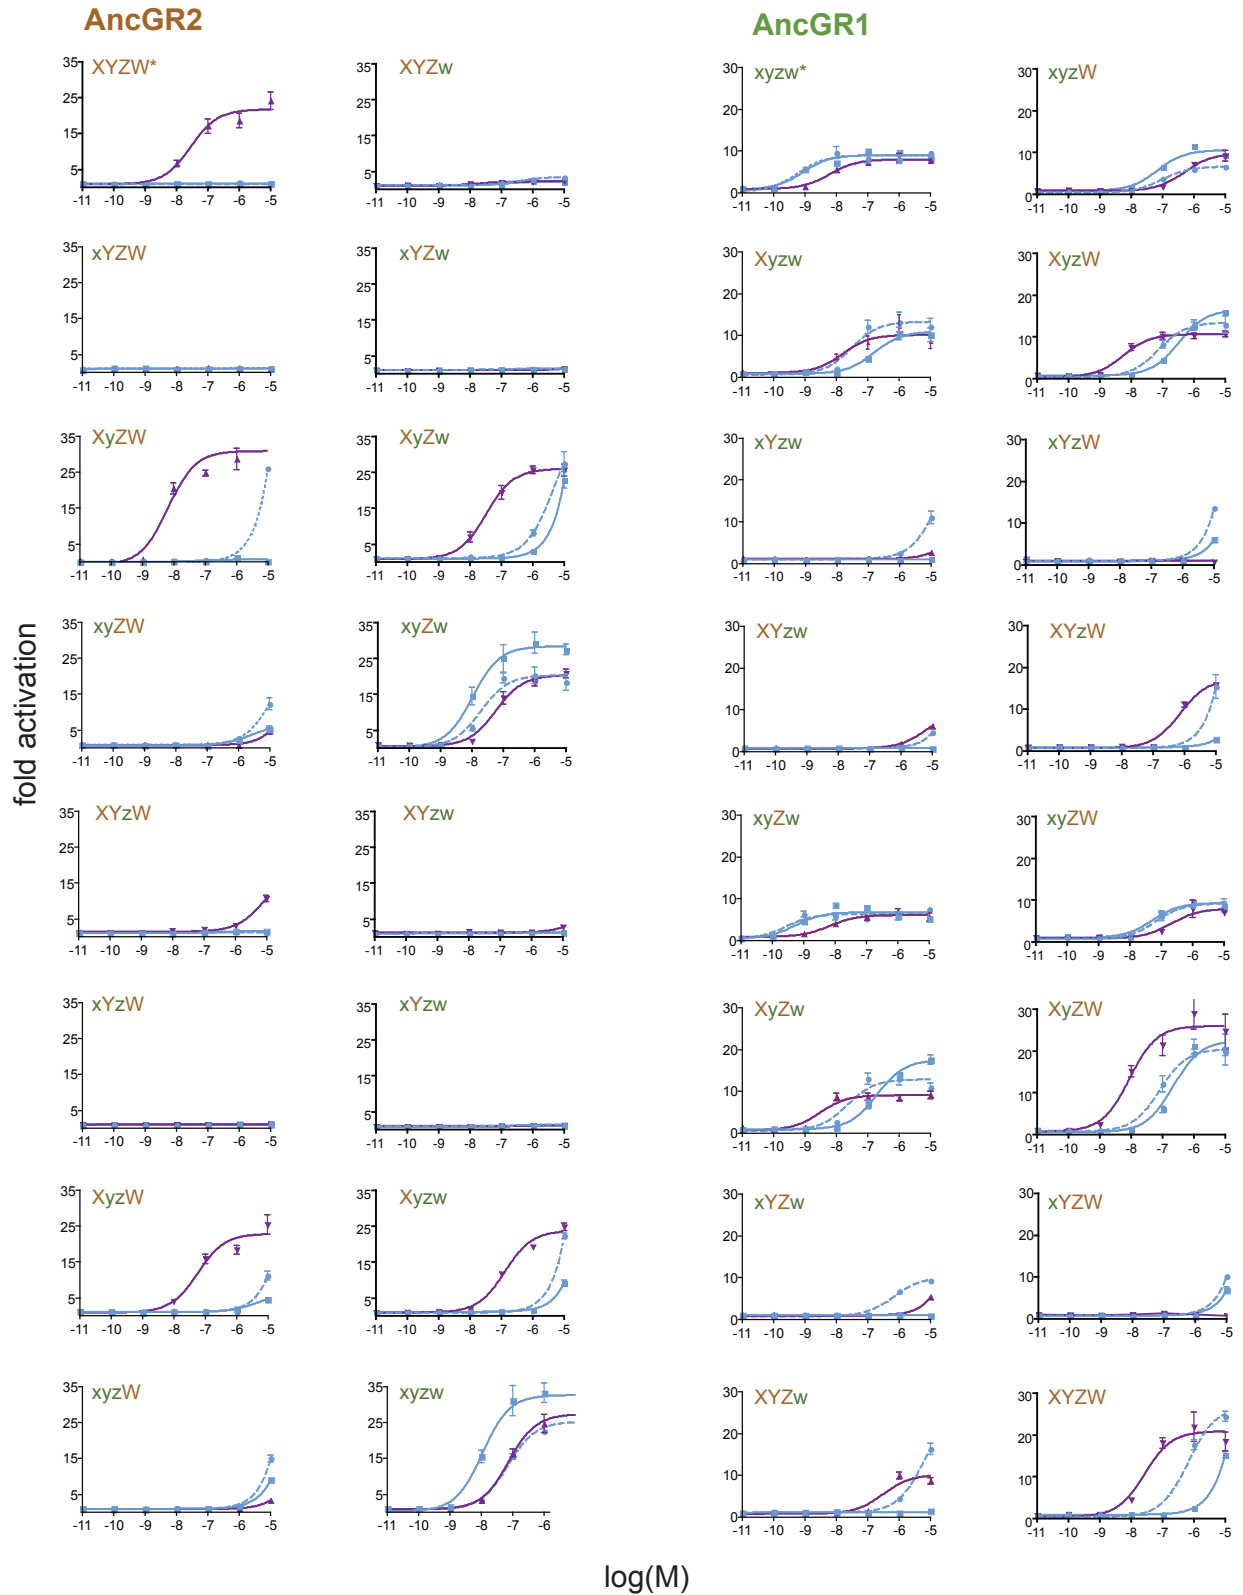

Supplement: NIHMS129299-supplement-1.pdf [file NIHMS129299-supplement-1.pdf]
